# Supplementary material
Source: PubMed Central journal article supplement (PMC9989957)
Supplement: jamainternmed-e230047-s002.pdf [file jamainternmed-e230047-s002.pdf]

## Supplemental Online Content

Sanchis J, Bueno H, Miñana G, et al. Effect of routine invasive vs conservative strategy in older adults with frailty and non–ST-segment elevation acute myocardial infarction: a randomized clinical trial. *JAMA Intern Med*. Published online March 6, 2023. doi:10.1001/jamainternmed.2023.0047

**eAppendix 1.** List of the Committees and Members

**eAppendix 2.** Participant Centres and Number of Patients Recruited

**eFigure 1.** Clinical Frailty Scale

**eFigure 2.** CONSORT Flow Diagram

**eFigure 3.** Readmission After Hospital Discharge

**eTable.** Invasive Management and Risk of Hospital Stay According to Diagnosis After Discharge of the Index Episode

This supplemental material has been provided by the authors to give readers additional information about their work.

## **eAppendix 1. List of the Committees and Members**

### *-Steering Committee:*

Dr Juan Sanchis

Dr Albert Ariza

Dr Héctor Bueno

*-Clinical Event Committee:* Consisted of physicians not participating in the trial and blinded to the patients' treatment allocation and trial results.

Dra. Jessika González. INCLIVA, Valencia, Spain

Dra. M<sup>a</sup> José Forner. Internal Medicine Department, University Clinic Hospital, Valencia, Spain

### *-CRO and monitoring*

SCReN platform. INCLIVA, Valencia, Spain.

### *-CRF*

DATARUS, Barcelona, Spain

### *-Statistics*

Eduardo Núñez

## **eAppendix 2. Participant centres and number of patients recruited**

- H.Clinic Universitari València: 40
- H.Bellvitge Barcelona: 28
- H. Centra de la Defensa Madrid: 22
- H.GregorioMarañón Madrid: 15
- H.12 Octubre Madrid: 12
- H.La Princesa Madrid: 11
- H.Vall d'Hebrón Barcelona: 11
- H.Virgen Arrixaca Murcia: 9
- H.Sureste Madrid: 8
- H. Ramón y Cajal Madrid: 7
- H.Germans Trias i Pujol Badalona: 7
- H.Santa Creu i San Pau Barcelona: 6
- H.St. Joan Despí Barcelona: 1

**eFigure 1. Clinical Frailty Scale**

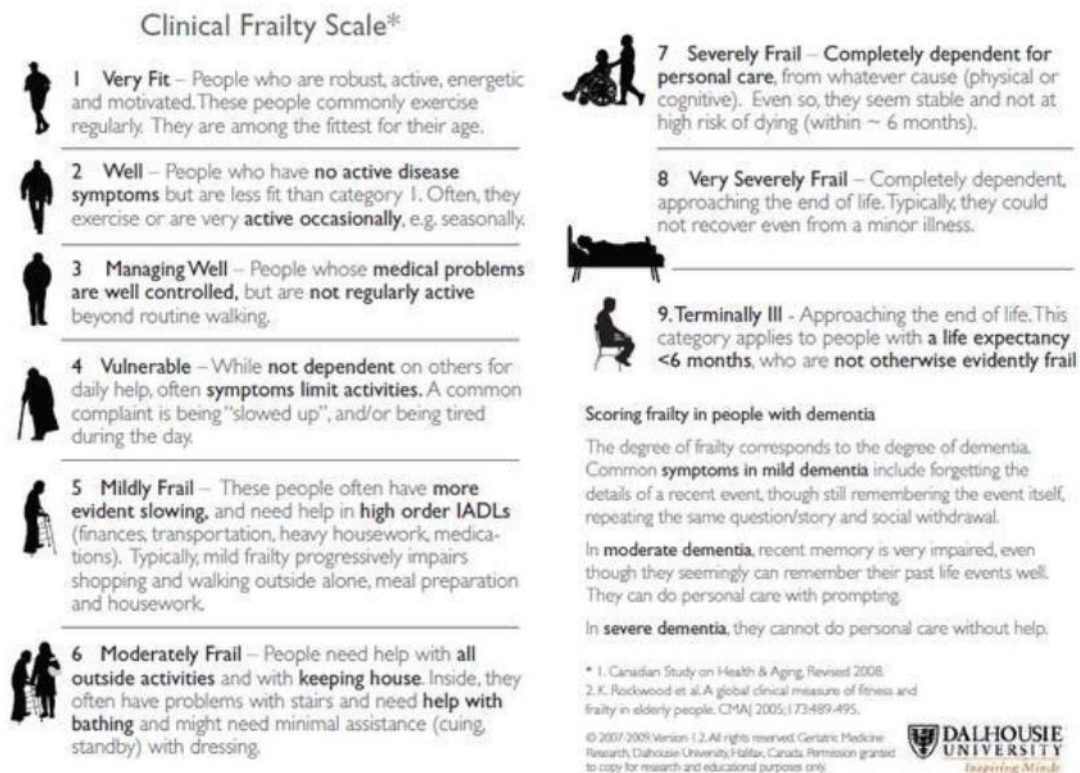

**eFigure 2. CONSORT Flow Diagram**

n = 169 participants

Randomization

Routine invasive (n = 85)  
• 1 excluded (consent withdrawn)

Conservative (n = 84)  
• 1 excluded (inclusion criteria violation)

12-month evaluation (n = 84)

12-month evaluation (n = 83)

**eFigure 3. Readmission after hospital discharge. Number of days spent in the hospital in both study groups**

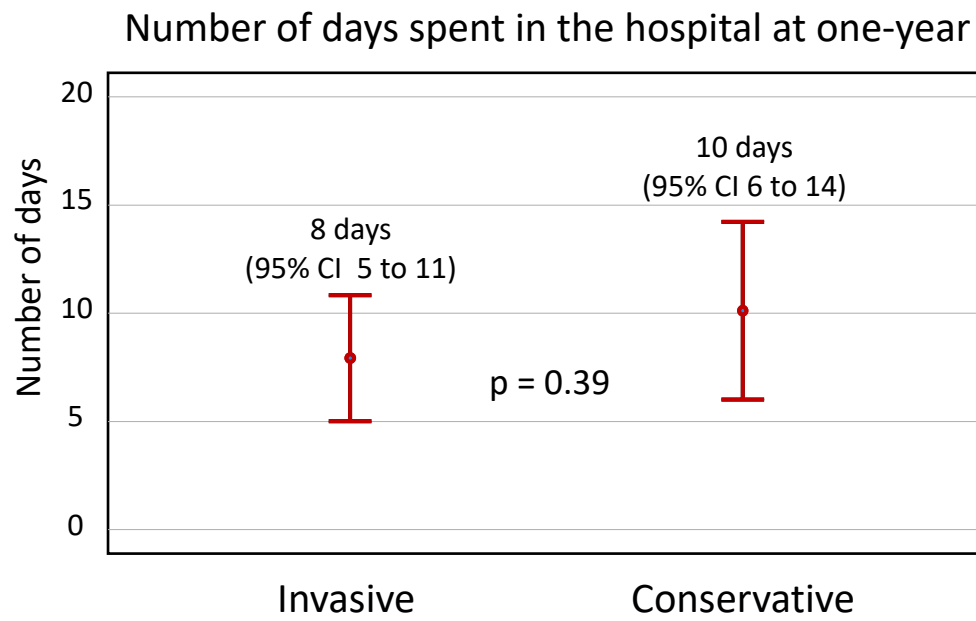

**eTable. Invasive management and risk of hospital stay according to diagnosis after discharge of the index episode (analysis adjusted for informative dropout due to death)**

|                                                                   | IRR  | 95% CI       | p   |
|-------------------------------------------------------------------|------|--------------|-----|
| Myocardial infarction                                             | 1.03 | 0.61 to 1.72 | .90 |
| Myocardial infarction /<br>revascularization                      | 1.11 | 0.69 to 1.78 | .66 |
| Myocardial infarction /<br>unstable angina /<br>revascularization | 0.97 | 0.50 to 1.88 | .94 |
| Heart failure                                                     | 0.92 | 0.44 to 1.91 | .83 |
| Other cardiac reasons                                             | 1.17 | 0.30 to 4.62 | .83 |
| Stroke                                                            | 2.57 | 0.41 to 16.1 | .31 |
| Bleeding                                                          | 13.2 | 1.55 to 112  | .02 |
| Other non-cardiac reasons                                         | 0.74 | 0.33 to 1.70 | .49 |

Abbreviations: IRR = Incidence rate ratio. CI = Confidence interval
