# Supplementary material
Source: PubMed Central journal article supplement (PMC9989957)
Supplement: jamainternmed-e230047-s003.pdf [file jamainternmed-e230047-s003.pdf]

## Data Sharing Statement

Sanchis. Effect of Routine Invasive vs Conservative Strategy in Older Adults With Frailty and Non-ST-Segment Elevation Acute Myocardial Infarction. *JAMA Intern Med*. Published March 06, 2023. doi:10.1001/jamainternmed.2023.0047

### Data

**Data available:** Yes

**Data types:** Deidentified participant data

**How to access data:** The MOSCA-FRAIL study is committed to responsible data sharing.

Data sharing will be considered upon reasonable request. The data in the case report forms (DATARUS, Barcelona, Spain) can be exported in different formats depending on the nature of the collaboration. All collaborations will be made after a collaboration agreement

**When available:** With publication

### Supporting Documents

**Document types:** None

### Additional Information

**Who can access the data:** The MOSCA-FRAIL study is committed to responsible data sharing. Data sharing will be considered upon reasonable request. The data in the case report forms (DATARUS, Barcelona, Spain) can be exported in different formats depending on the nature of the collaboration. All collaborations will be made after a collaboration agreement

**Types of analyses:** The MOSCA-FRAIL study is committed to responsible data sharing. Data sharing will be considered upon reasonable request. The data in the case report forms (DATARUS, Barcelona, Spain) can be exported in different formats depending on the nature of the collaboration. All collaborations will be made after a collaboration agreement

**Mechanisms of data availability:** After approval of a proposal
